# Supplementary material
Source: publisher figshare collection journal article supplement (https://frontiersin.figshare.com/ndownloader/files/21980904)
Supplement: Supplementary file [file 21980904]

## Supplementary material

**Figure 1** Hierarchical concept map of terms covered by SMQs and PTs included in the study

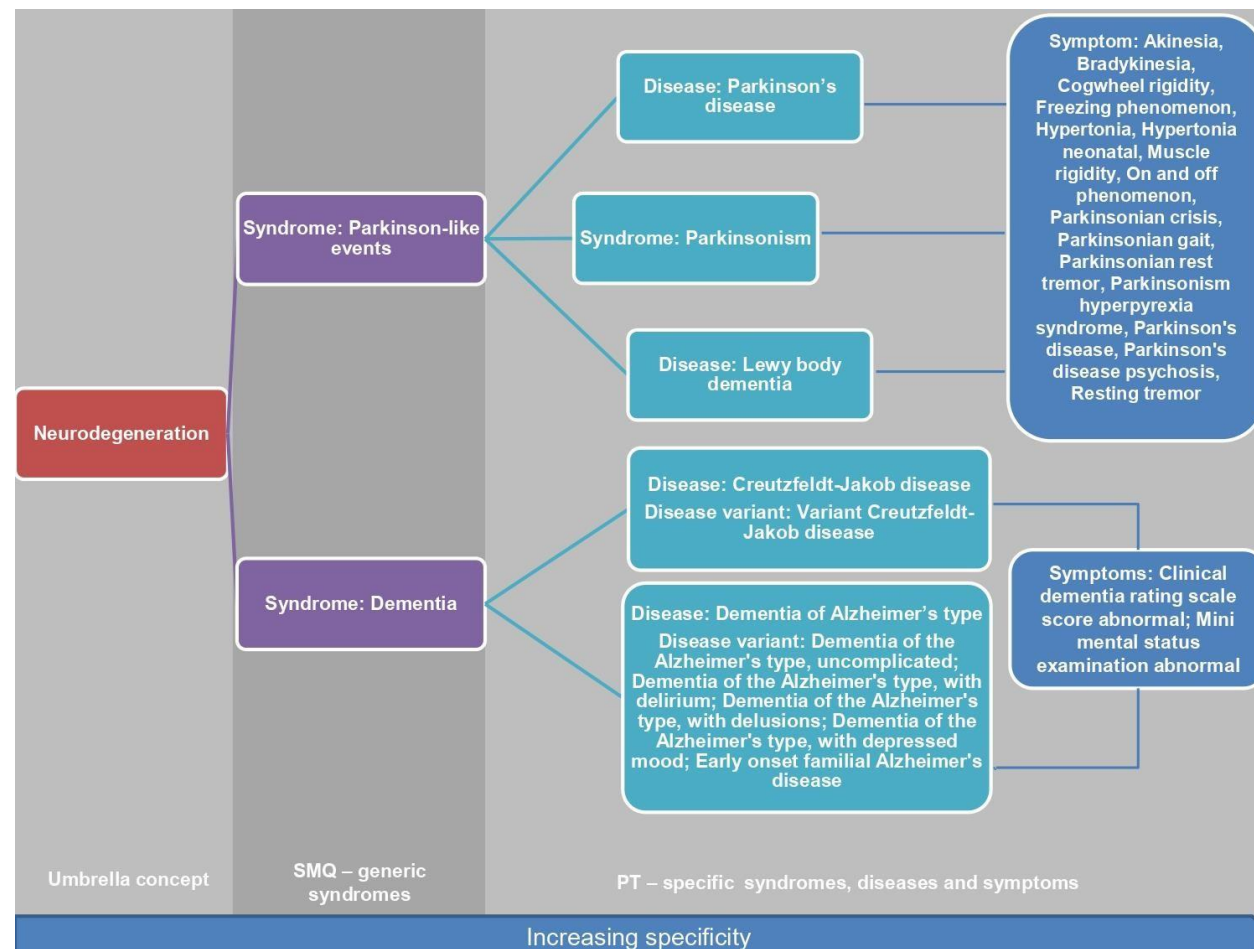

**Abbreviations:** SMQ: Standardised MedDRA® Queries; PT: Preferred Term
